# Supplementary material for: Modeling of Antioxidant Activity, Polyphenols and Macronutrients Content of Bee Pollen Applying Solid-State 13C NMR Spectra
Source: MDPI journal article supplement (doi:10.3390/antiox10071123), 2021-07-14
Supplement: s1 [file s1]

# Supplementary Materials: Modeling of Antioxidant Activity, Polyphenols and Macronutrients Content of Bee Pollen Applying Solid-State $^{13}\text{C}$ NMR Spectra

Sylwester Mazurek <sup>1,\*</sup>, Roman Szostak <sup>1,\*</sup>, Mateusz Kondratowicz <sup>1</sup>, Magdalena Węglińska <sup>1</sup>, Agnieszka Kita <sup>2</sup> and Agnieszka Nemś <sup>2</sup>

<sup>1</sup> Department of Chemistry, University of Wrocław, 14 F. Joliot-Curie, 50-383 Wrocław, Poland; mateusz.kondratowicz@chem.uni.wroc.pl (M.K.); magdalena.weglinska@chem.uni.wroc.pl (M.W.)

<sup>2</sup> Department of Food Storage and Technology, Faculty of Biotechnology and Food Science, Wrocław University of Environmental and Life Sciences, 37 Chelmońskiego, 51-630 Wrocław, Poland; agnieszka.kita@upwr.edu.pl (A.K.); agnieszka.nems@upwr.edu.pl (A.N.)

\* Correspondence: sylwester.mazurek@chem.uni.wroc.pl (S.M.); roman.szostak@chem.uni.wroc.pl (R.S.); Tel.: +48-71-3757-307 (S.M.); Fax.: +48-71-3757-420 (S.M.)

**Table S1.** Spectral regions used for PLS modeling.

| Analyzed parameter        | Region (ppm)        |
|---------------------------|---------------------|
| Reducing sugars           | 50-200              |
| Protein                   | 10-22 and 53-170    |
| Fat                       | 40-110 and 140-170  |
| Total polyphenols         | 100-170             |
| Antioxidant activity ABTS | 73-158              |
| NHCS                      | 10-200              |
| C                         | 20-200              |
| N                         | 10-22 and 53-170    |
| S                         | 130-160 and 180-200 |
| pH                        | 110-130 and 160-180 |

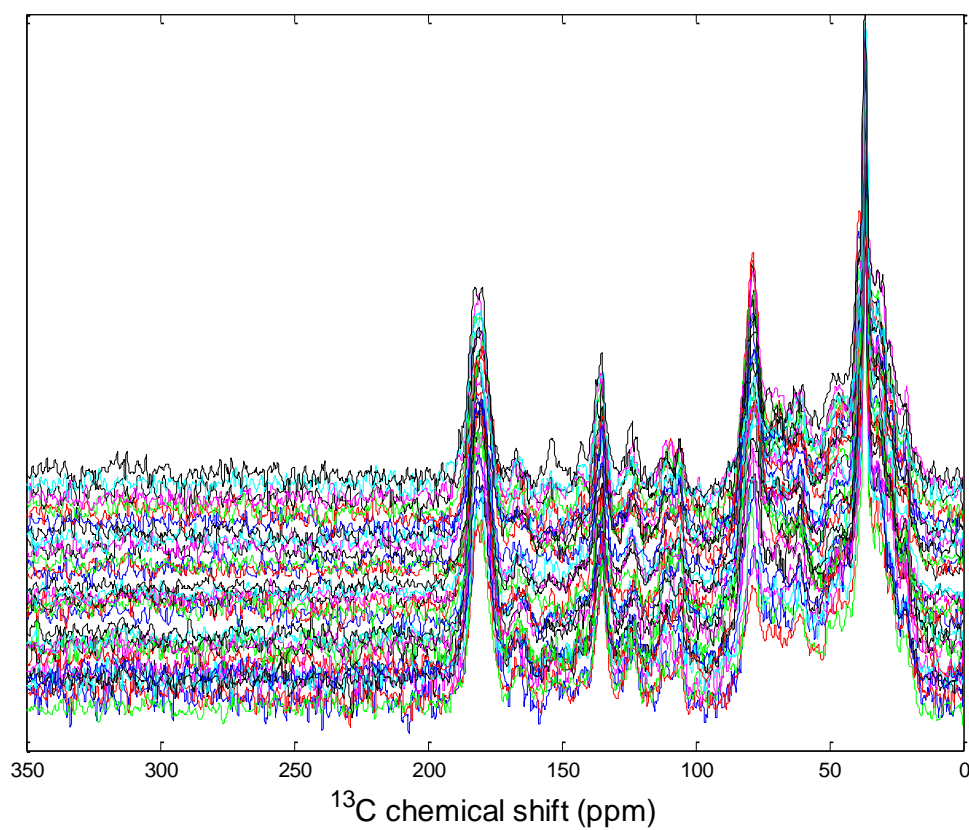

**Figure S1.**  $^{13}\text{C}$  CPMAS NMR spectra of the analyzed bee pollen samples.

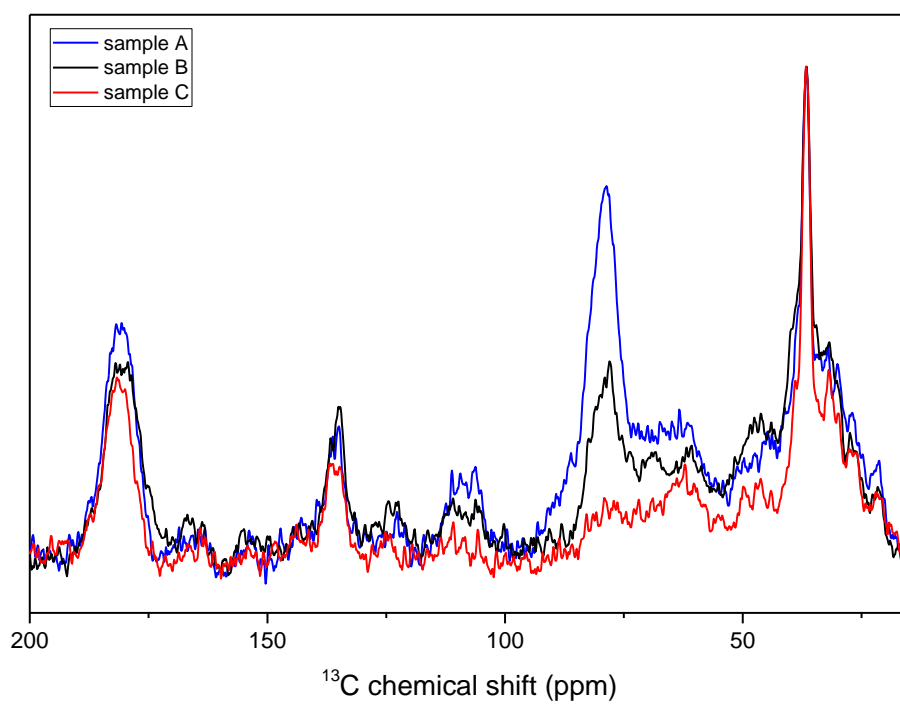

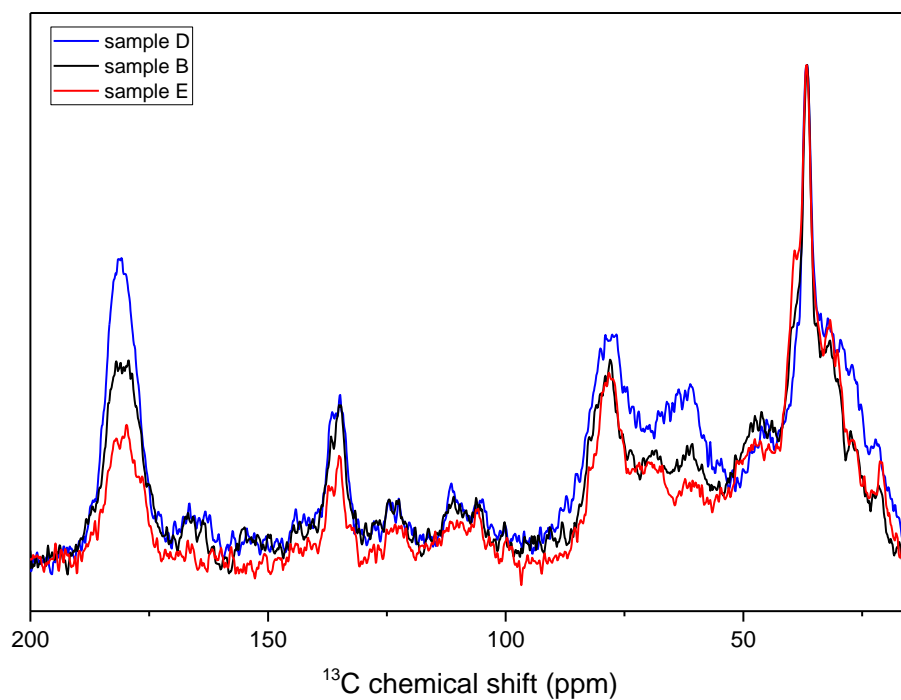

**Figure S2.**  $^{13}\text{C}$  NMR spectra of selected bee pollen samples A-E; labeling as in Fig. 3.

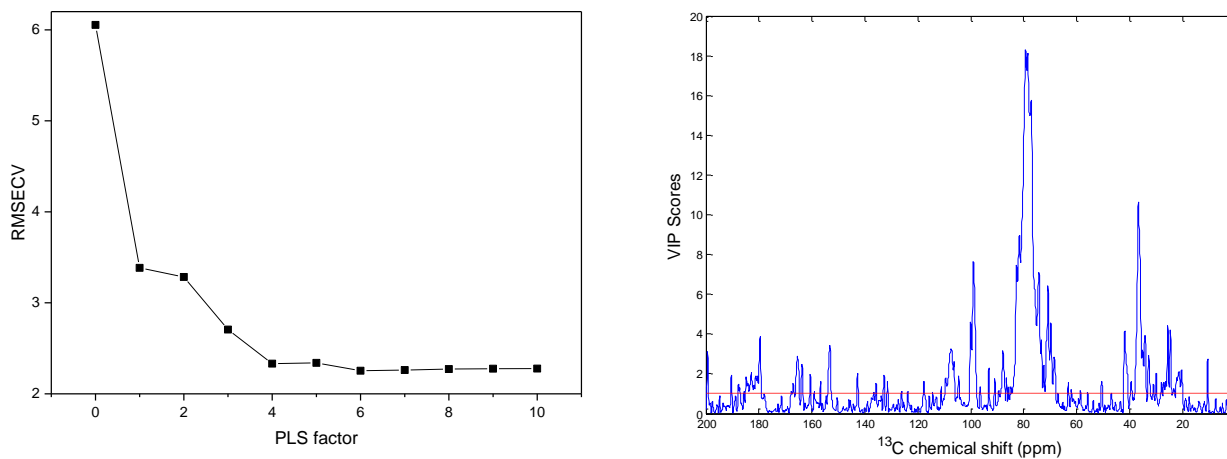

**Figure S3.** Modeling of reducing sugars content in pollen samples on the basis of  $^{13}\text{C}$  NMR spectra; the RMSECV (left) and VIP scores (right) plots.

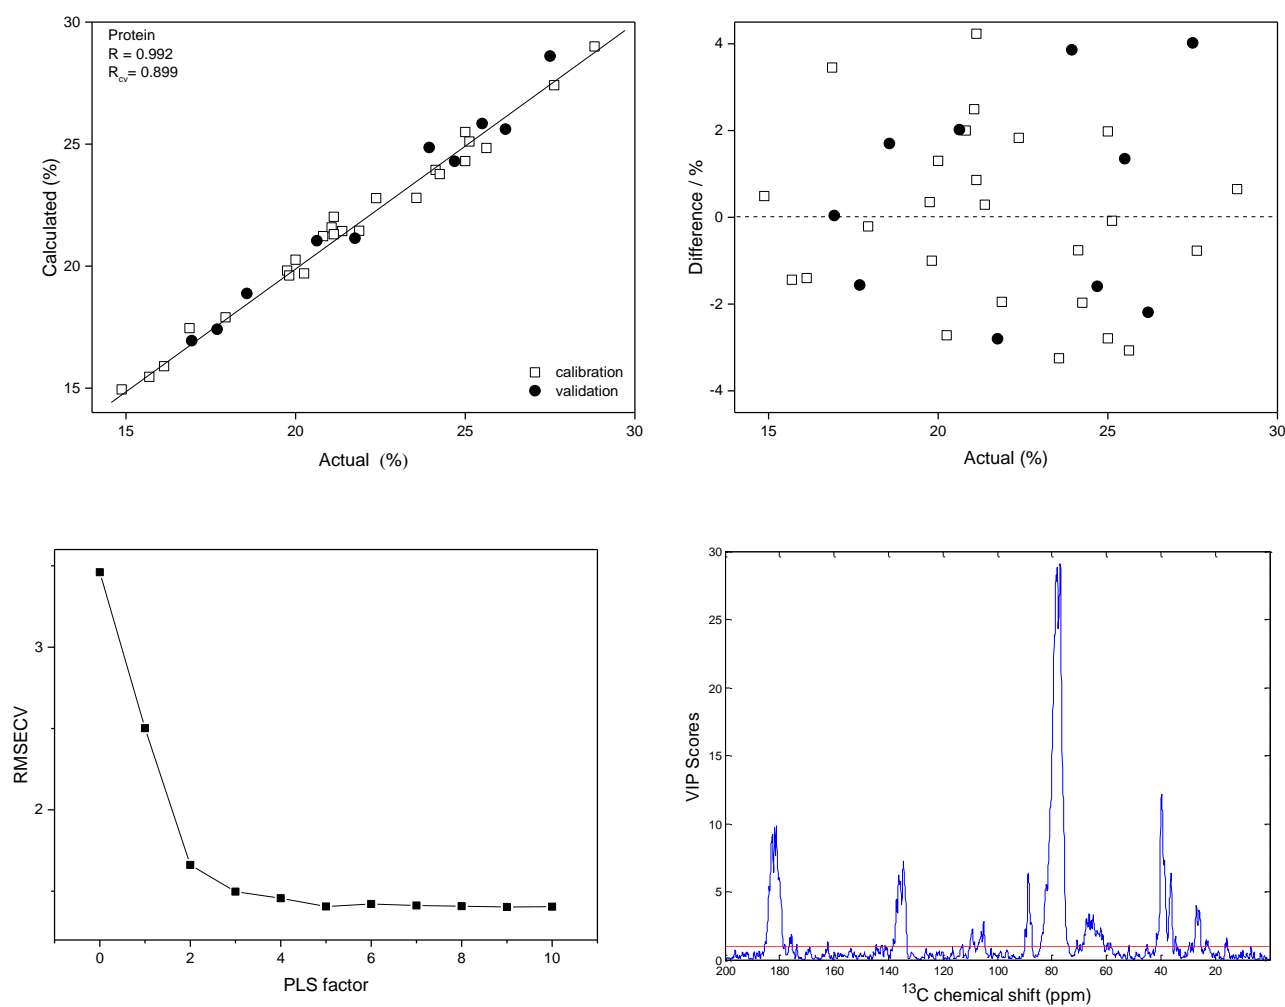

**Figure S4.** Modeling of protein content in pollen samples on the basis of  $^{13}\text{C}$  NMR spectra; top panel: prediction plot (left) and relative errors (right), bottom panel: the RMSECV (left) and VIP scores (right) plots.

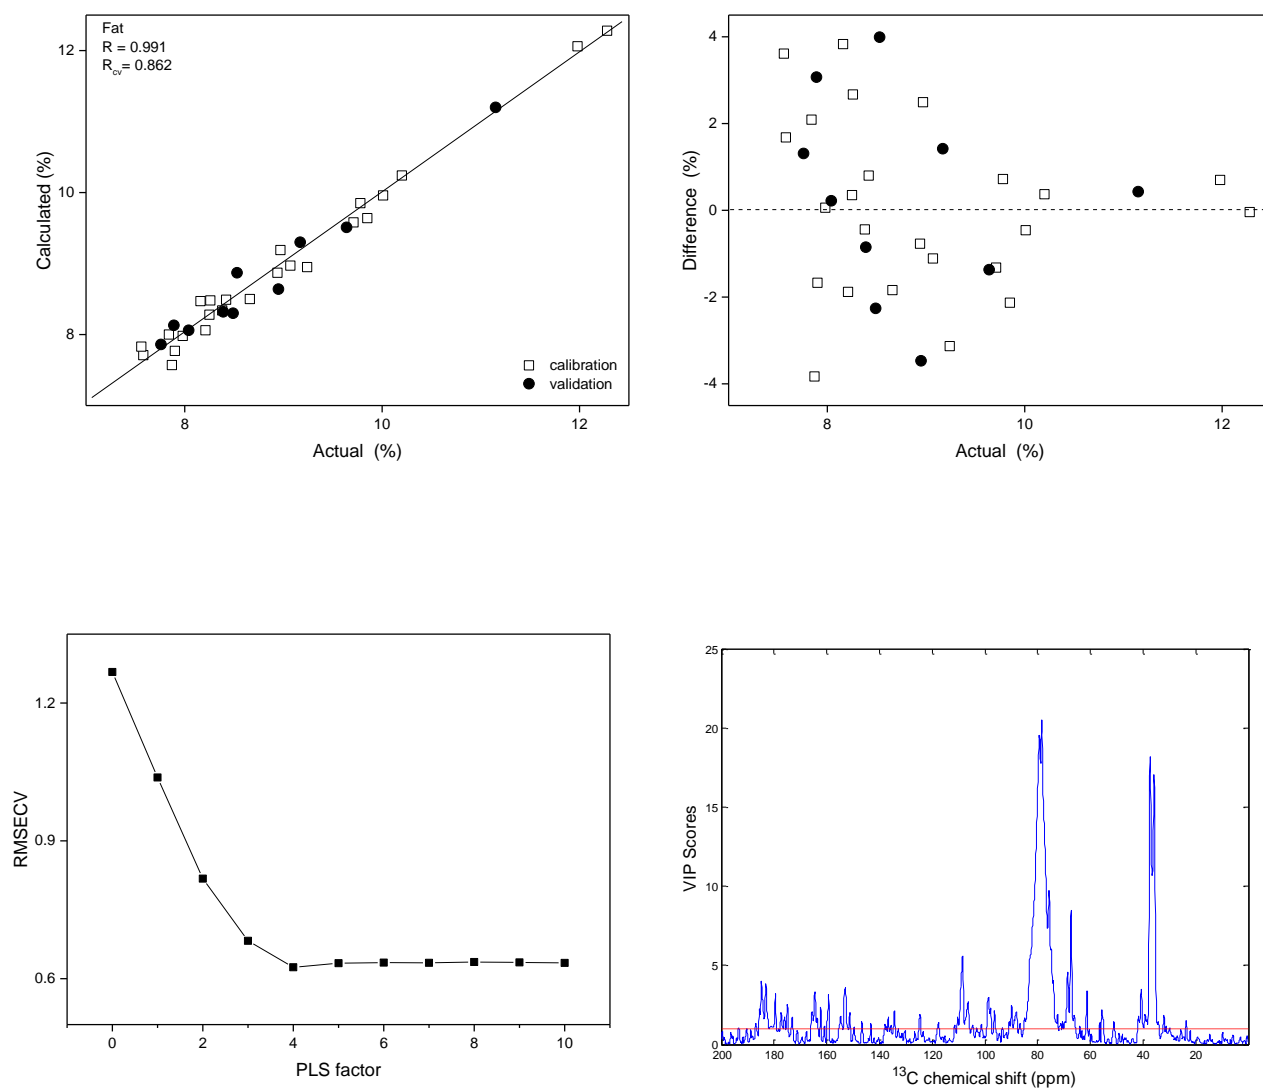

**Figure S5** Modeling of fat content in pollen samples on the basis of  $^{13}\text{C}$  NMR spectra; top panel: prediction plot (left) and relative errors (right), bottom panel: the RMSECV (left) and VIP scores (right) plots

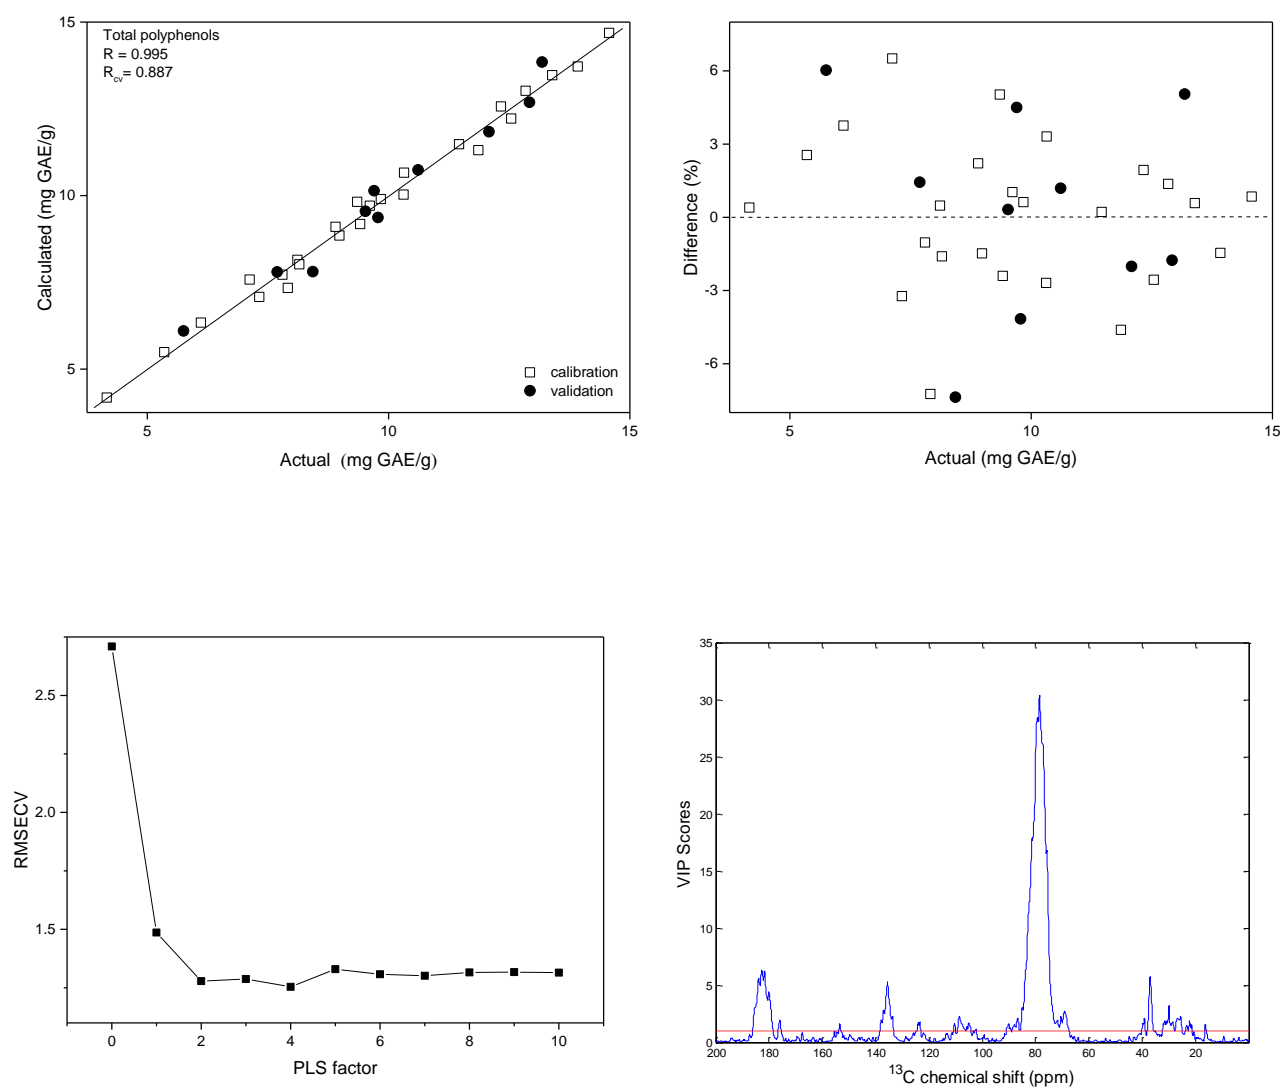

**Figure S6** Modeling of total polyphenolic compounds content in pollen samples on the basis of  $^{13}\text{C}$  NMR spectra; top panel: prediction plot (left) and relative errors (right), bottom panel: the RMSECV (left) and VIP scores (right) plots

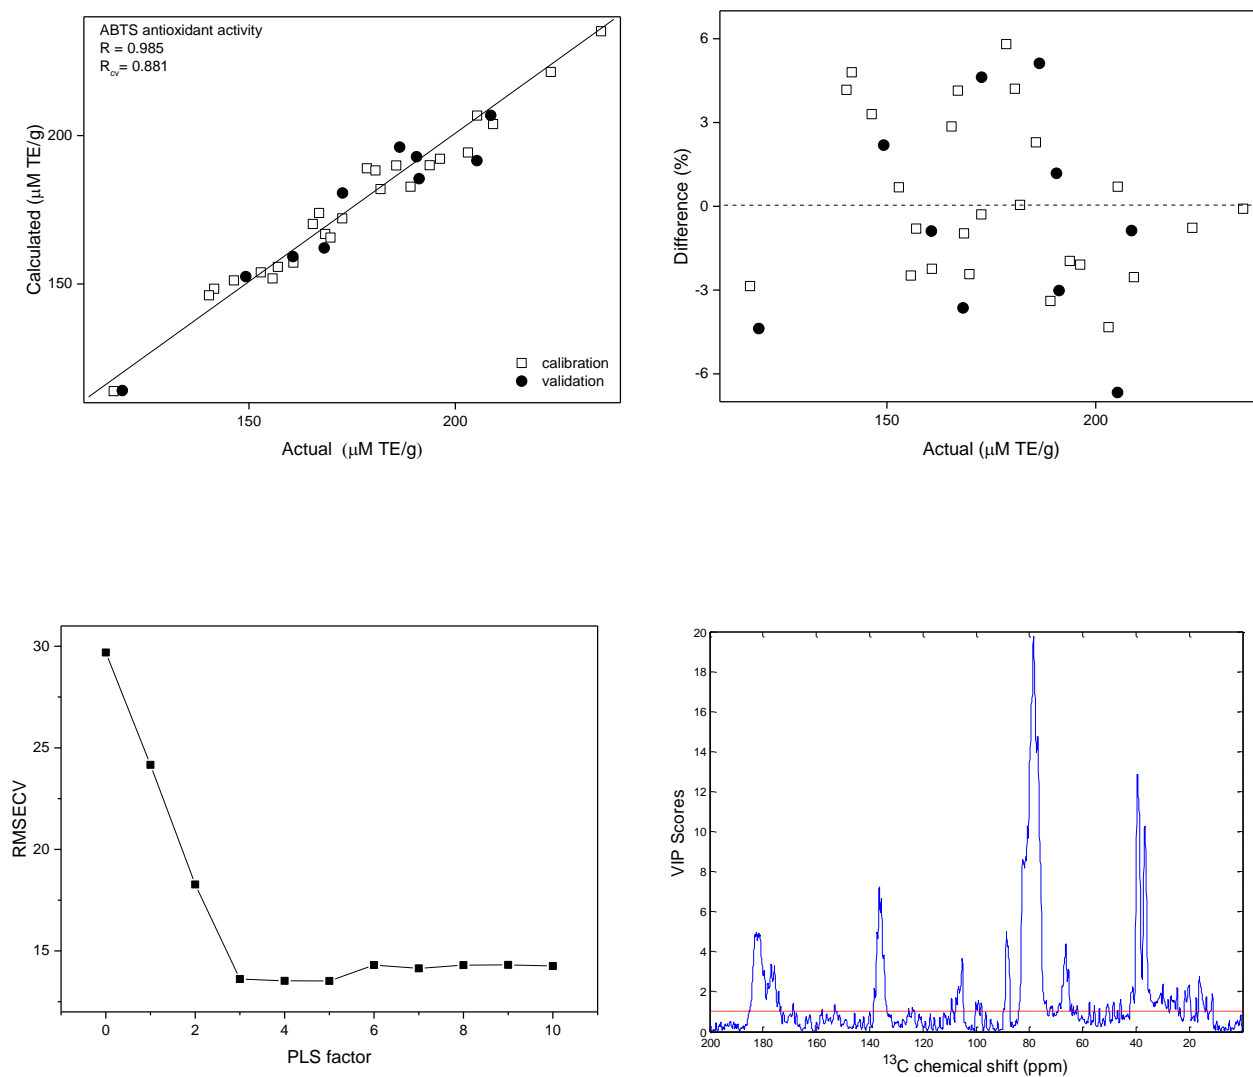

**Figure S7** Modeling of ABTS antioxidant activity in pollen samples on the basis of  $^{13}\text{C}$  NMR spectra; top panel: prediction plot (left) and relative errors (right), bottom panel: the RMSECV (left) and VIP scores (right) plots

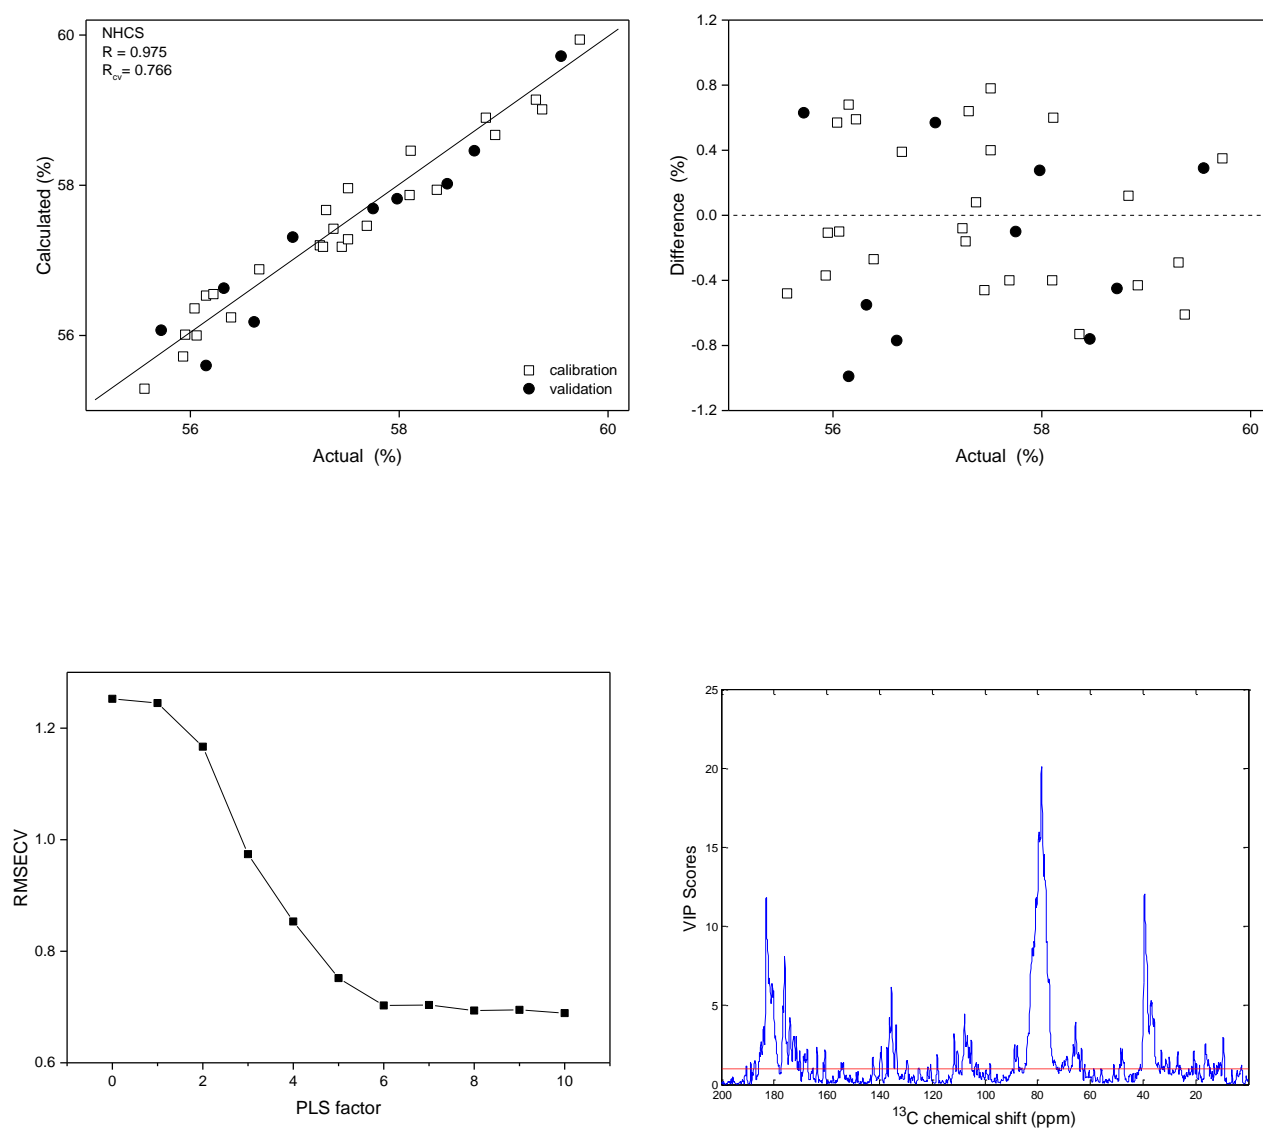

**Figure S8** Modeling of NHCS content in pollen samples on the basis of  $^{13}\text{C}$  NMR spectra; top panel: prediction plot (left) and relative errors (right), bottom panel: the RMSECV (left) and VIP scores (right) plots



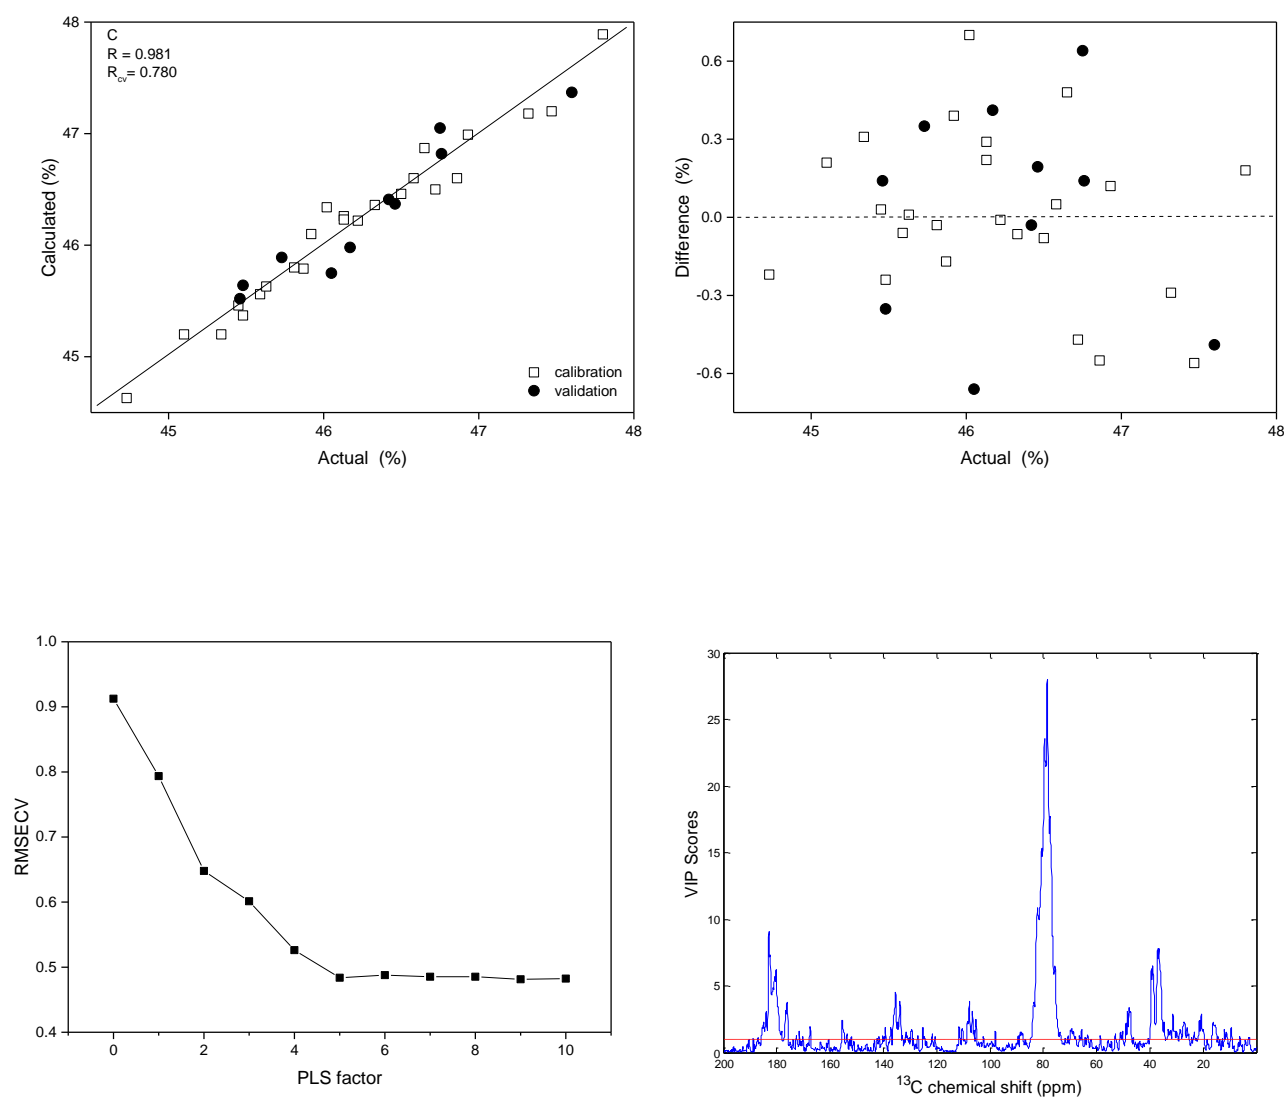

**Figure S9** Modeling of C content in pollen samples on the basis of  $^{13}\text{C}$  NMR spectra; top panel: prediction plot (left) and relative errors (right), bottom panel: the RMSECV (left) and VIP scores (right) plots

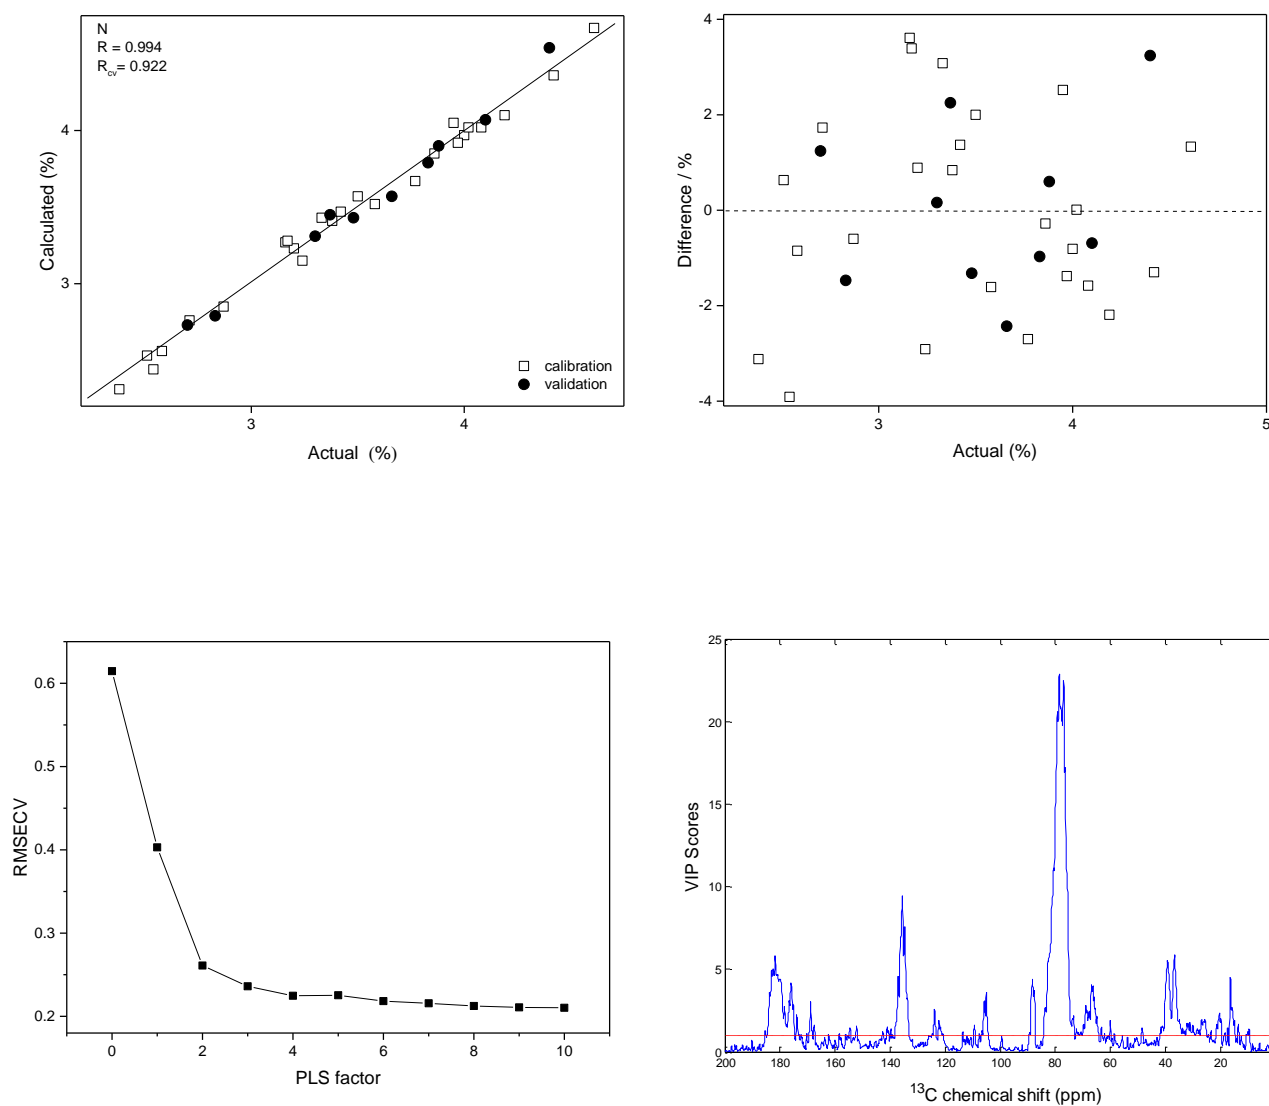

**Figure S10** Modeling of N content in pollen samples on the basis of  $^{13}\text{C}$  NMR spectra; top panel: prediction plot (left) and relative errors (right), bottom panel: the RMSECV (left) and VIP scores (right) plots

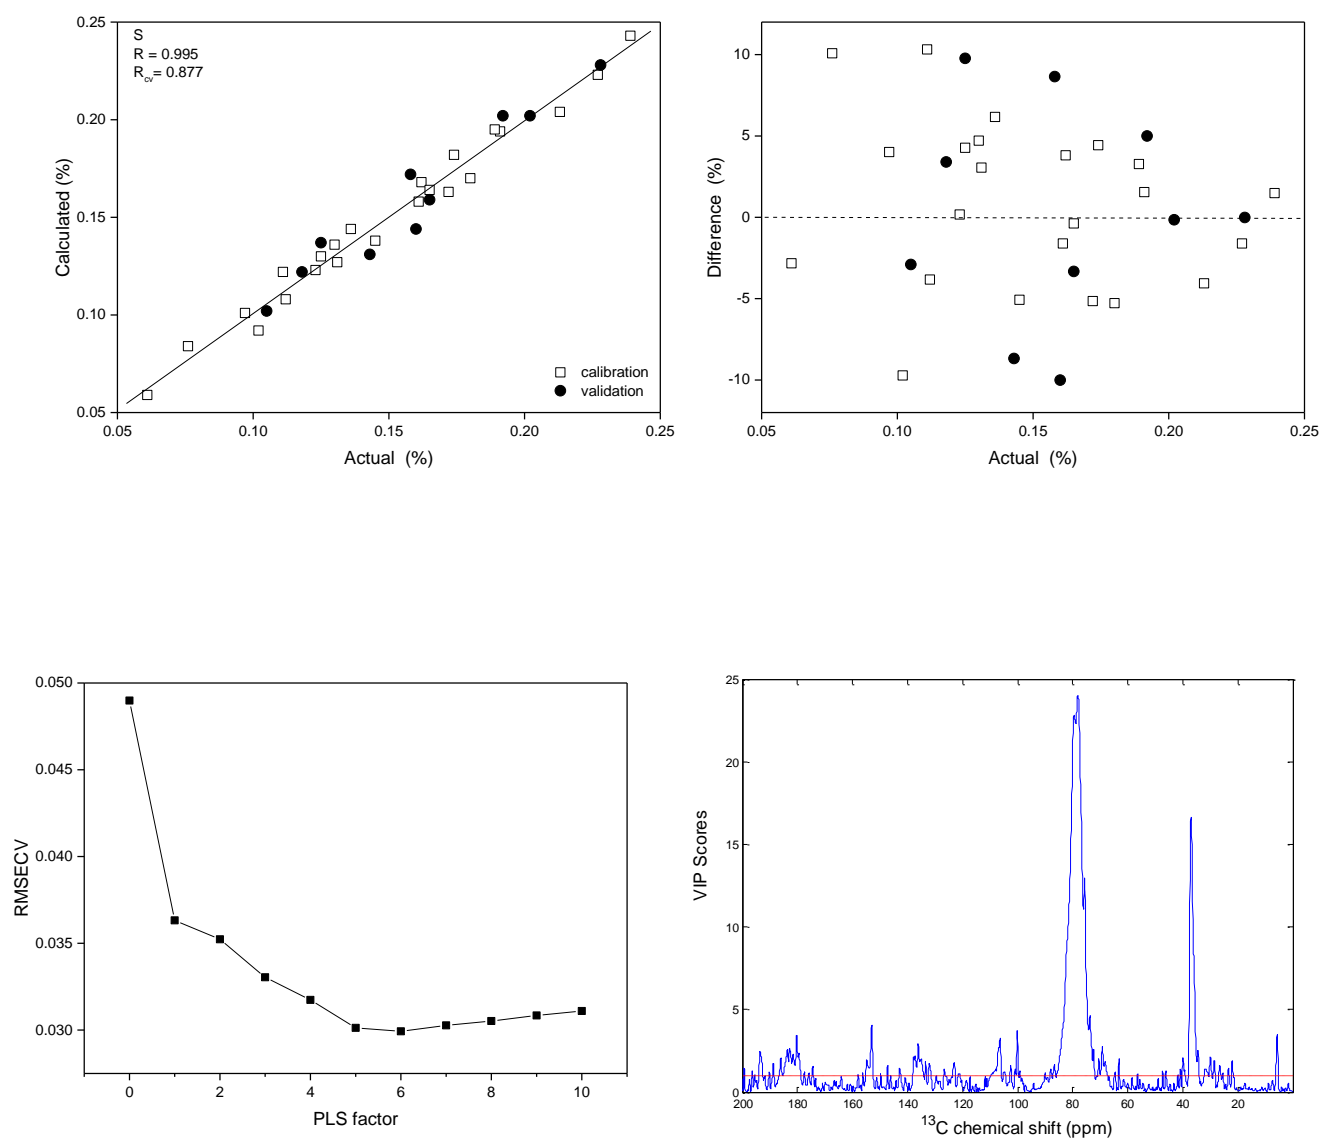

**Figure S11** Modeling of S content in pollen samples on the basis of  $^{13}\text{C}$  NMR spectra; top panel: prediction plot (left) and relative errors (right), bottom panel: the RMSECV (left) and VIP scores (right) plots

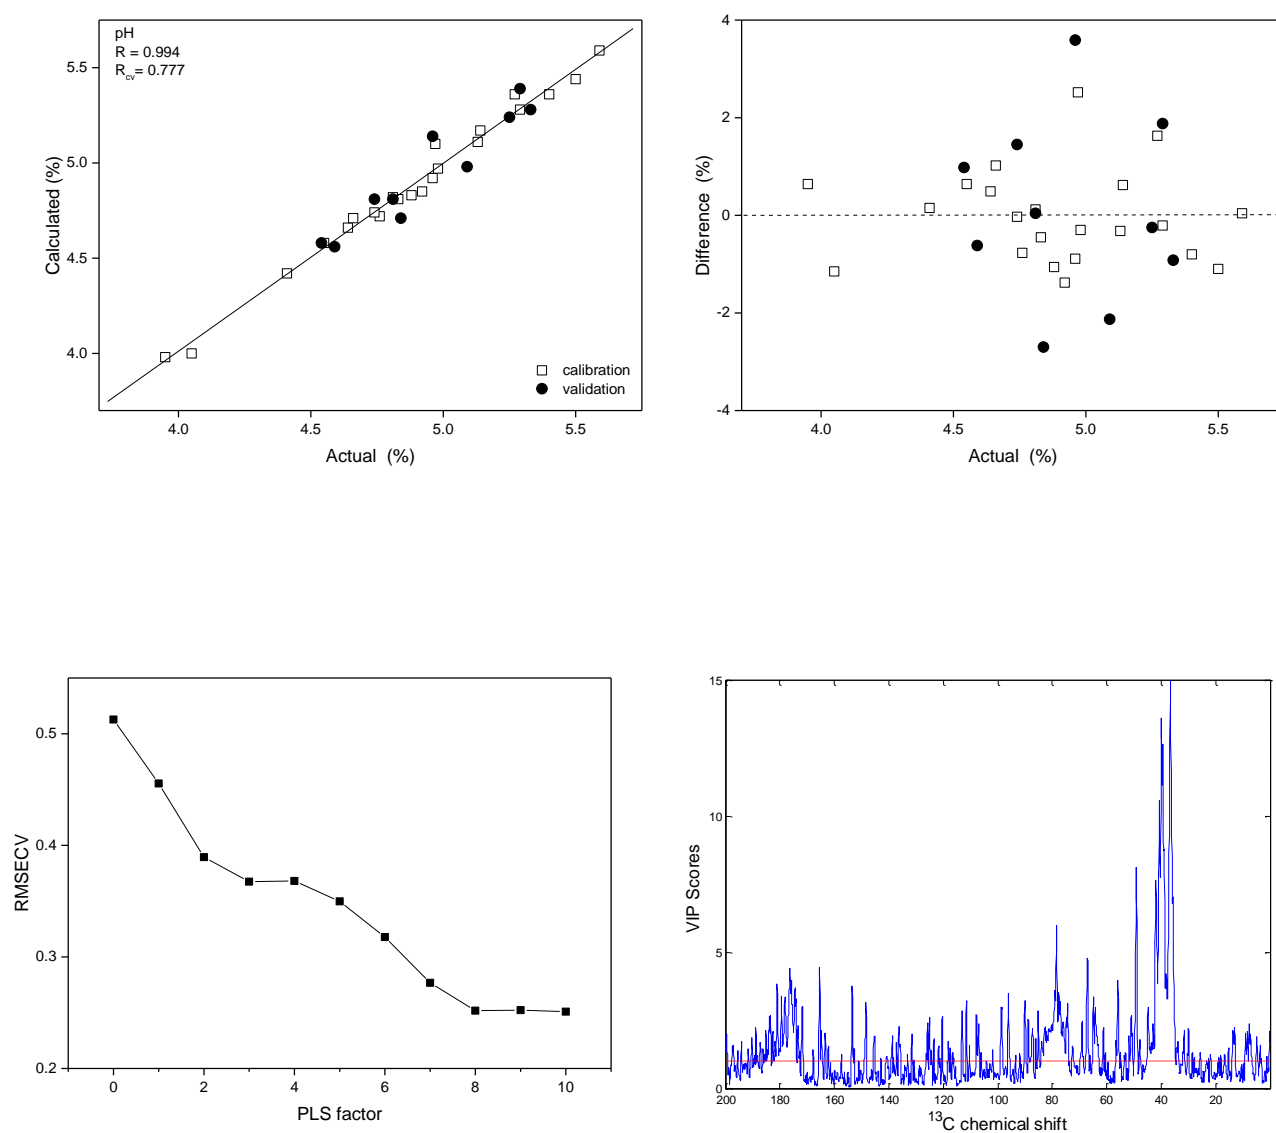

**Figure S12** Modeling of pH of pollen samples on the basis of  $^{13}\text{C}$  NMR spectra; top panel: prediction plot (left) and relative errors (right), bottom panel: the RMSECV (left) and VIP scores (right) plots
